# Supplementary material for: Two years of COVID-19: Excess mortality by age, region, gender, and race/ethnicity in the United States during the COVID-19 pandemic, March 1, 2020, through February 28, 2022
Source: bioRxiv or medRxiv preprint supplement (doi:10.1101/2022.08.16.22278800), 2022-09-26

## Supplementary Appendix

### Table of Contents

|                                                                 |    |
|-----------------------------------------------------------------|----|
| <i>Supplemental Figure 1A</i> .....                             | 3  |
| <i>Supplemental Figure 1B, Supplemental Figure 1C</i> .....     | 4  |
| <i>Supplemental Figure 1D</i> .....                             | 5  |
| <i>Supplemental Figure 1E</i> .....                             | 5  |
| <i>Supplementary Table 1</i> .....                              | 6  |
| <i>Supplemental Figure 2A, Supplemental Figure 2A.2</i> .....   | 7  |
| <i>Supplemental Figure 2B, Supplemental Figure 2B.2</i> .....   | 8  |
| <i>Supplemental Figure 2C, Supplemental Figure 2C.2</i> .....   | 9  |
| <i>Supplemental Figure 2D, Supplemental Figure 2D.2</i> .....   | 10 |
| <i>Supplemental Figure 2E.1, Supplemental Figure 2E.2</i> ..... | 11 |
| <i>Supplemental Figure 2E.3, Supplemental Figure 2E.4</i> ..... | 12 |
| <i>Supplemental Figure 3</i> .....                              | 13 |

Supplement to: Faust JS, Renton B, Du C *et al.* Two years of Covid-19: Excess mortality by age, region, gender, and race/ethnicity in the United States during the Covid-19 pandemic, March 1, 2020, through February 28, 2022.

This appendix has been provided by the authors to give readers additional information about the work.

**Supplemental figure legends:**

Figure 1A. Excess and COVID-19–Attributed Deaths in the United States, by state, March 1, 2020, through February 28, 2022.

Figure 1B. Observed (yellow) and expected (blue) deaths, by state, March 1, 2020, through February 28, 2022.

Figure 1C. Observed (yellow) and expected (blue) deaths, by state, per 100,000 person-months, March 1, 2020, through February 28, 2022.

Figure 1D. Share of excess deaths by Census Bureau region, March 1, 2020, through February 28, 2022.

Figure 1E. Cumulative excess deaths by Census Bureau division, per 100,000 person-months.

Table 1. Excess and COVID-19–Attributed Deaths in the United States, by Census Bureau region, Ages  $\geq 65$  years, March 1, 2020, through February 28, 2022

Figure 2. Monthly observed (yellow) and expected (blue) deaths in the United States, by age group and state, March 1, 2020, through February 28, 2022.

Panel A: Ages  $\geq 65$  years, per 100,000 person-months.

Panel B: Ages 50-64 years, per 100,000 person-months.

Panel C: Ages 18-49 years, per 100,000 person-months.

Panel D: Ages 0-17 years, per 100,000 person-months.

Figure 2E. Excess and COVID-19–Attributed Deaths in the United States, by state and age group, March 1, 2020, through February 28, 2022.

Figure 3. Monthly excess deaths in the United States, by race or ethnicity, March 1, 2020, through February 28, 2022.

Panel A: Excess mortality, all ages, ages 0-17, ages 18-49, ages 50-64, ages  $\geq 65$  years, by non-Hispanic Black race (blue), non-Hispanic White race (green), and Hispanic ethnicity (yellow).

Panel B: Observed (yellow) and expected (blue) deaths, Ages 0-17 years.

Panel C: Observed (yellow) and expected (blue) deaths, Ages 18-49 years.

Panel D: Observed (yellow) and expected (blue) deaths, Ages 50-64 years.

Panel E: Observed (yellow) and expected (blue) deaths, Ages  $\geq 65$  years.

Panel F: Observed (yellow) and expected (blue) deaths, all ages.

# Supplemental Figure 1A

## Excess and COVID-19 Mortality: States, All Ages

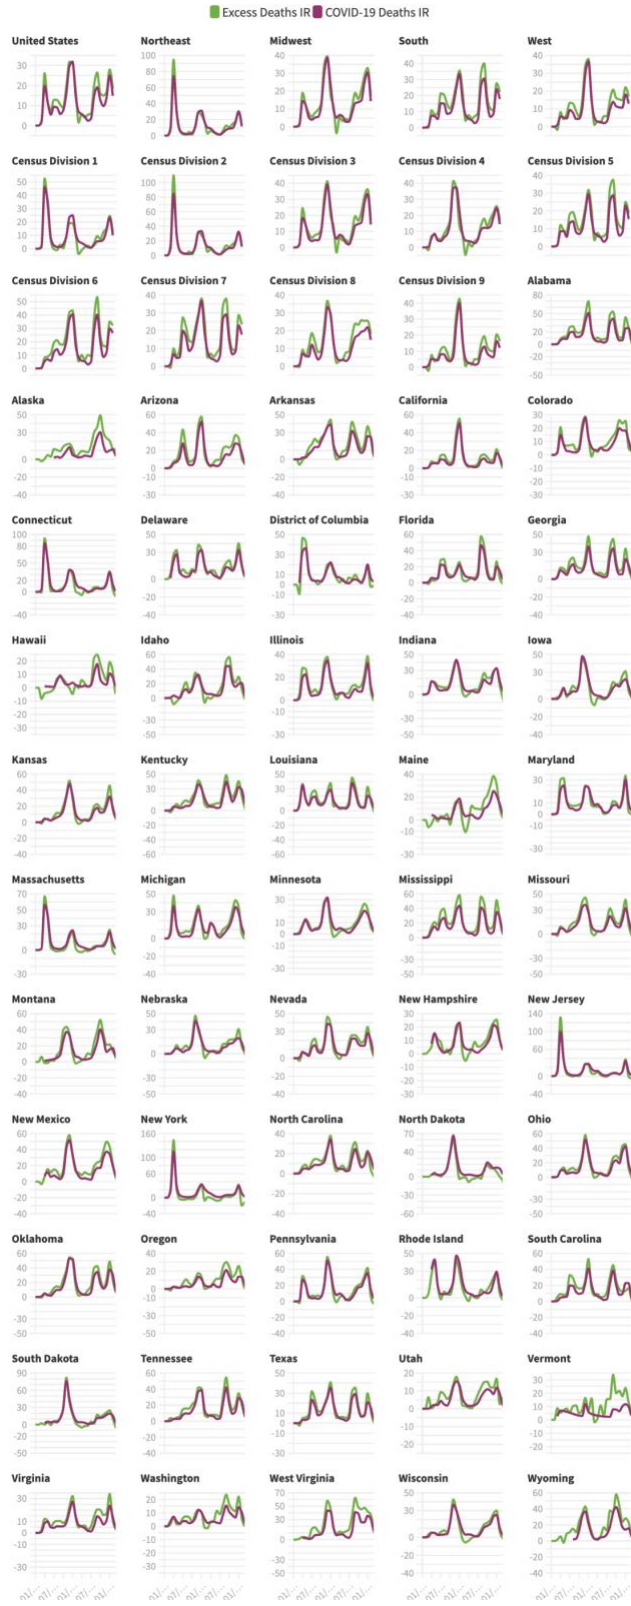

# Supplemental Figure 1B

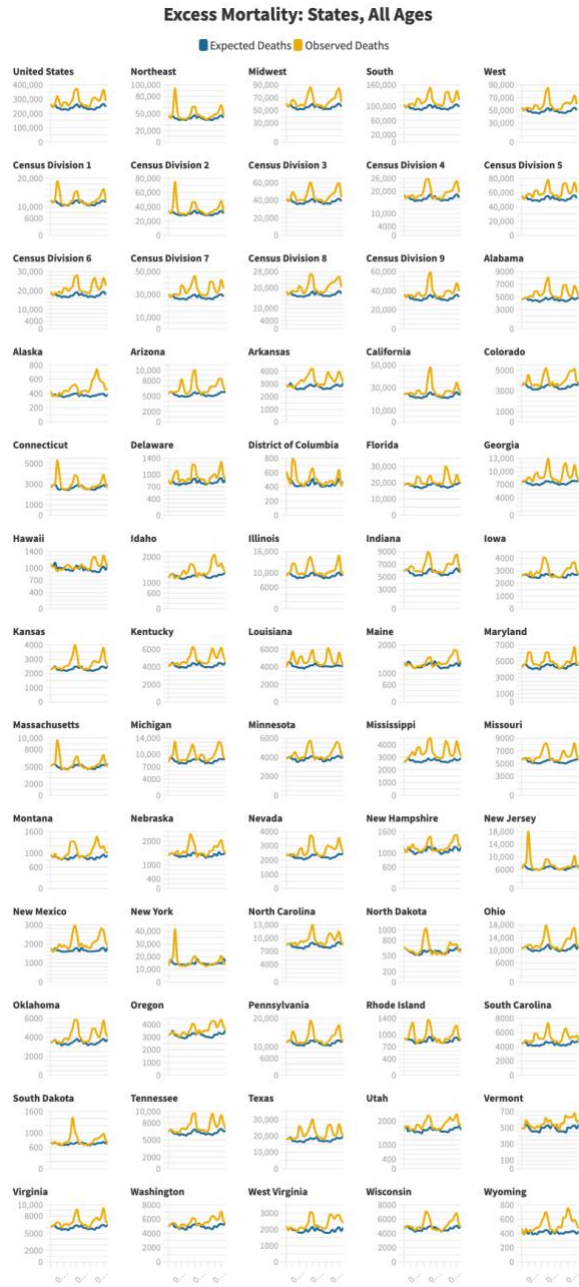

# Supplemental Figure 1C

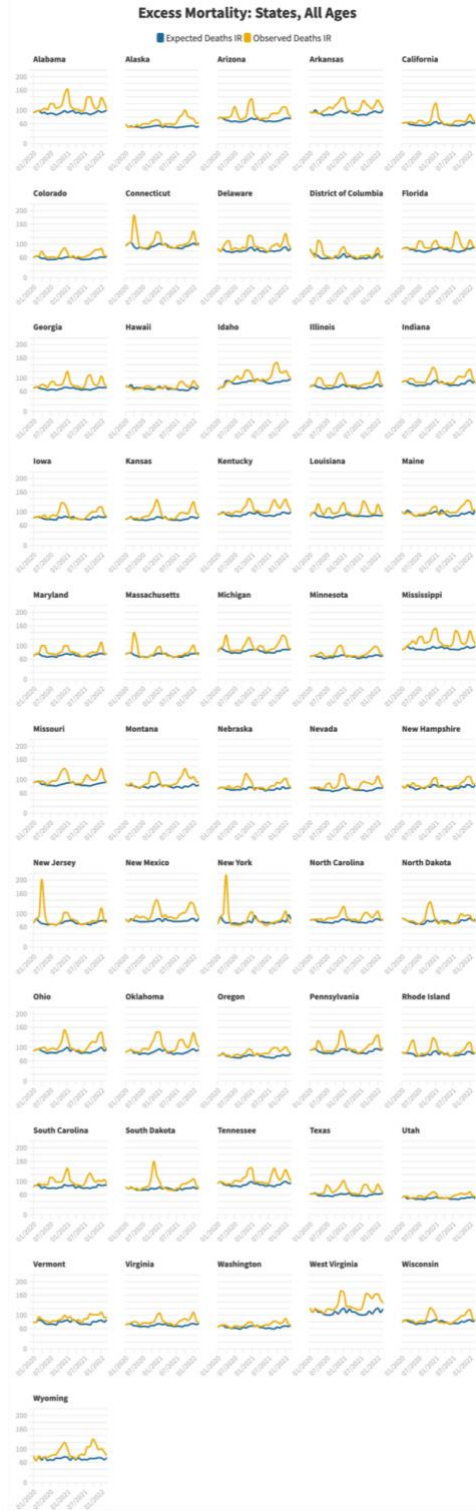

Supplemental Figure 1D

Share of Excess Deaths by Census Regions

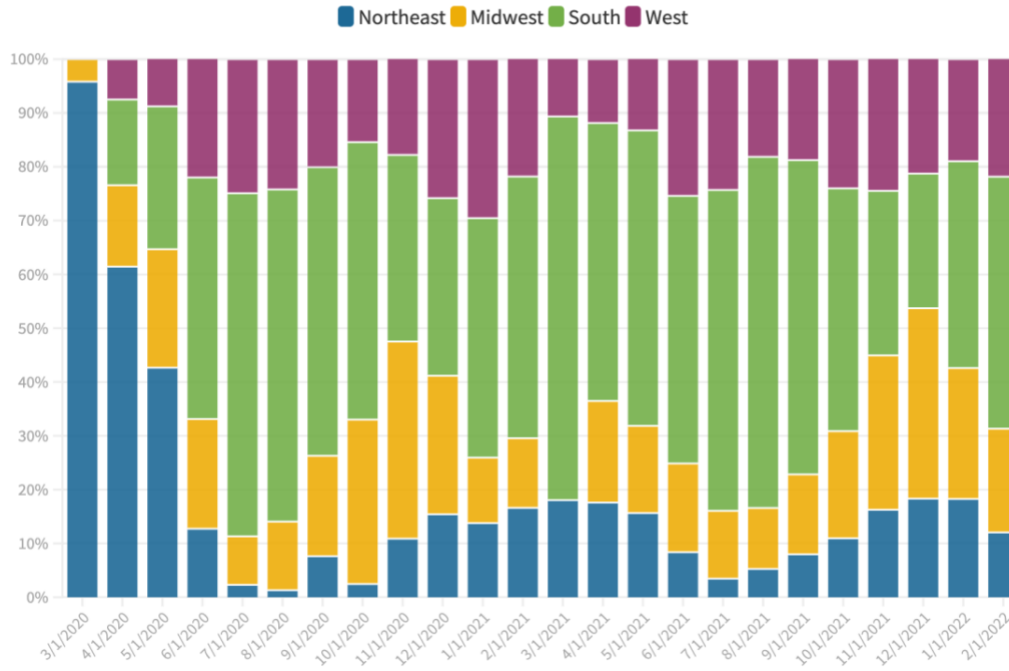

Supplemental Figure 1E

Cumulative All-Cause Excess Mortality by Census Division, IR  
March 1, 2020-February 28, 2022

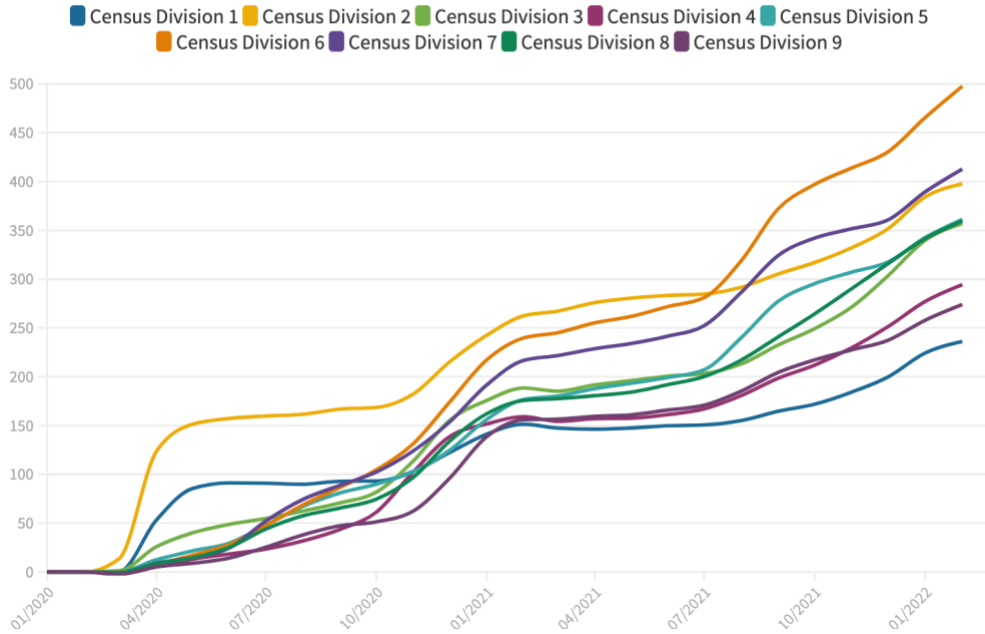

# Supplementary Table 1

|                                                       | Expected deaths (95% CI)          | Observed deaths | Ratio of observed to expected deaths (95% CI) | Excess deaths, no (95% CI)  | Excess deaths, IR (100,000 person-months) | Covid-19 deaths, no | Covid-19 deaths, IR (100,000 person-months) | Excess Deaths (100,000 person-waves) |
|-------------------------------------------------------|-----------------------------------|-----------------|-----------------------------------------------|-----------------------------|-------------------------------------------|---------------------|---------------------------------------------|--------------------------------------|
| <b>US, Ages 65+</b>                                   |                                   |                 |                                               |                             |                                           |                     |                                             |                                      |
| Wave 1 (March-May 2020, 3 months)                     | 552,618 (530,797 - 574,439)       | 650,435         | 1.18 (1.13 - 1.23)                            | 97,817 (75,996 - 119,638)   | 58.89                                     | 89,076              | 53.63                                       | 176.68                               |
| Wave 2 (June 2020-September 2020, 4 months)           | 670,005 (645,149 - 694,861)       | 768,610         | 1.15 (1.11 - 1.19)                            | 98,605 (73,749 - 123,461)   | 44.23                                     | 75,075              | 33.68                                       | 176.92                               |
| Wave 3 (October 2020-February 2021, 5 months)         | 923,222 (895,156 - 951,289)       | 1,201,153       | 1.30 (1.26 - 1.34)                            | 277,931 (249,864 - 305,997) | 98.93                                     | 269,649             | 95.98                                       | 494.66                               |
| Spring 2021 (March 2021-June 2021, 4 months)          | 722,197 (696,823 - 747,571)       | 737,431         | 1.02 (0.99 - 1.06)                            | 15,234 (-10,140 - 40,608)   | 6.73                                      | 44,383              | 19.60                                       | 26.90                                |
| Delta (July 2021-December 2021, 6 months)             | 1,068,970 (1,037,701 - 1,100,238) | 1,265,664       | 1.18 (1.15 - 1.22)                            | 196,695 (165,426 - 227,963) | 57.29                                     | 149,421             | 43.52                                       | 343.71                               |
| Omicron (January 2022-February 2022, 2 months)        | 374,950 (357,170 - 392,731)       | 488,146         | 1.30 (1.24 - 1.37)                            | 113,196 (95,415 - 130,976)  | 98.22                                     | 99,068              | 85.96                                       | 196.44                               |
| 2020 (March 2020-December 2020, 10 months)            | 1,774,887                         | 2,129,235       | 1.20                                          | 354,349                     | 63.57                                     | 310,769             | 55.76                                       | 635.75                               |
| 2021 (January 2021-December 2021, 12 months)          | 2,162,125                         | 2,494,058       | 1.15                                          | 331,933                     | 48.64                                     | 316,835             | 46.43                                       | 583.67                               |
| 2022 (January 2022-February 2022, 2 months)           | 374,950 (357,170 - 392,731)       | 488,146         | 1.30 (1.24 - 1.37)                            | 113,196 (95,280 - 131,111)  | 98.22                                     | 99,068              | 85.96                                       | 196.44                               |
| Post Wave 1 (June 2020-February 2022, 21 months)      | 3,759,344                         | 4,461,004       | 1.19                                          | 701,660                     | 59.01                                     | 637,596             | 53.63                                       | 1239.30                              |
| Pandemic period (March 2020-February 2022, 24 months) | 4,311,962                         | 5,111,439       | 1.19                                          | 799,477                     | 59.00                                     | 726,672             | 53.63                                       | 1415.98                              |
| <b>Midwest</b>                                        |                                   |                 |                                               |                             |                                           |                     |                                             |                                      |
| Wave 1 (March-May 2020, 3 months)                     | 127,805 (122,171 - 133,439)       | 143,710         | 1.12 (1.08 - 1.18)                            | 15,905 (10,271 - 21,539)    | 44.93                                     | 15,687              | 44.32                                       | 134.80                               |
| Wave 2 (June 2020-September 2020, 4 months)           | 154,614 (148,197 - 161,032)       | 168,860         | 1.09 (1.05 - 1.14)                            | 14,246 (7,828 - 20,663)     | 29.99                                     | 11,248              | 23.68                                       | 119.97                               |
| Wave 3 (October 2020-February 2021, 5 months)         | 213,571 (206,324 - 220,817)       | 279,825         | 1.31 (1.27 - 1.36)                            | 66,254 (59,008 - 73,501)    | 110.85                                    | 67,787              | 113.41                                      | 254.23                               |
| Spring 2021 (March 2021-June 2021, 4 months)          | 166,289 (159,737 - 172,840)       | 165,257         | 0.99 (0.96 - 1.03)                            | -1,032 (-7,583 - 5,520)     | -2.14                                     | 9,543               | 19.82                                       | -8.57                                |
| Delta (July 2021-December 2021, 6 months)             | 247,928 (239,855 - 256,002)       | 290,208         | 1.17 (1.13 - 1.21)                            | 42,280 (34,206 - 50,353)    | 57.95                                     | 35,379              | 48.49                                       | 347.70                               |
| Omicron (January 2022-February 2022, 2 months)        | 86,228 (81,637 - 90,819)          | 111,041         | 1.29 (1.22 - 1.36)                            | 24,813 (20,222 - 29,404)    | 101.46                                    | 22,758              | 93.06                                       | 202.92                               |
| 2020 (March 2020-December 2020, 10 months)            | 410,759 (400,588 - 420,930)       | 491,825         | 1.20 (1.17 - 1.23)                            | 81,066 (70,895 - 91,237)    | 68.28                                     | 75,214              | 63.35                                       | 682.76                               |
| 2021 (January 2021-December 2021, 12 months)          | 499,448 (488,164 - 510,733)       | 556,035         | 1.11 (1.09 - 1.14)                            | 56,587 (45,302 - 67,871)    | 39.01                                     | 64,430              | 44.42                                       | 468.14                               |
| 2022 (January 2022-February 2022, 2 months)           | 86,228 (81,602 - 90,854)          | 111,041         | 1.29 (1.22 - 1.36)                            | 24,813 (20,187 - 29,439)    | 101.46                                    | 22,758              | 93.06                                       | 202.92                               |
| Post Wave 1 (June 2020-February 2022, 21 months)      | 868,630 (851,838 - 885,422)       | 1,015,191       | 1.17 (1.15 - 1.19)                            | 146,561 (129,769 - 163,353) | 57.97                                     | 146,715             | 58.03                                       | 1217.28                              |
| Pandemic period (March 2020-February 2022, 24 months) | 996,435 (977,985 - 1,014,886)     | 1,158,901       | 1.16 (1.14 - 1.18)                            | 162,466 (144,015 - 180,916) | 56.37                                     | 162,402             | 56.34                                       | 1352.76                              |
| <b>Northeast</b>                                      |                                   |                 |                                               |                             |                                           |                     |                                             |                                      |
| Wave 1 (March-May 2020, 3 months)                     | 99,448 (94,192 - 104,705)         | 159,996         | 1.61 (1.53 - 1.70)                            | 60,548 (55,291 - 65,804)    | 201.94                                    | 50,350              | 167.93                                      | 605.83                               |
| Wave 2 (June 2020-September 2020, 4 months)           | 118,558 (112,571 - 124,546)       | 123,035         | 1.04 (0.99 - 1.09)                            | 4,477 (-1,511 - 10,464)     | 11.17                                     | 6,464               | 16.13                                       | 44.69                                |
| Wave 3 (October 2020-February 2021, 5 months)         | 167,333 (160,572 - 174,094)       | 206,720         | 1.24 (1.19 - 1.29)                            | 39,387 (32,626 - 46,148)    | 78.07                                     | 44,173              | 87.56                                       | 390.35                               |
| Spring 2021 (March 2021-June 2021, 4 months)          | 128,078 (121,966 - 134,191)       | 130,873         | 1.02 (0.98 - 1.07)                            | 2,795 (-3,318 - 8,907)      | 6.88                                      | 10,550              | 25.99                                       | 27.53                                |
| Delta (July 2021-December 2021, 6 months)             | 189,340 (181,808 - 196,872)       | 212,892         | 1.12 (1.08 - 1.17)                            | 23,552 (16,020 - 31,084)    | 38.33                                     | 18,358              | 29.88                                       | 229.99                               |
| Omicron (January 2022-February 2022, 2 months)        | 67,740 (63,456 - 72,023)          | 86,268          | 1.27 (1.20 - 1.36)                            | 18,528 (14,245 - 22,812)    | 89.99                                     | 17,987              | 87.36                                       | 179.97                               |
| 2020 (March 2020-December 2020, 10 months)            | 317,409 (307,920 - 326,899)       | 402,735         | 1.27 (1.23 - 1.31)                            | 85,326 (75,836 - 94,815)    | 85.08                                     | 78,294              | 78.07                                       | 850.79                               |
| 2021 (January 2021-December 2021, 12 months)          | 385,349 (374,821 - 395,877)       | 430,781         | 1.12 (1.09 - 1.15)                            | 45,432 (34,904 - 55,960)    | 37.16                                     | 51,601              | 42.21                                       | 445.95                               |
| 2022 (January 2022-February 2022, 2 months)           | 67,740 (63,424 - 72,055)          | 86,268          | 1.27 (1.20 - 1.36)                            | 18,528 (14,213 - 22,844)    | 89.99                                     | 17,987              | 87.36                                       | 179.97                               |
| Post Wave 1 (June 2020-February 2022, 21 months)      | 671,050 (654,713 - 687,386)       | 759,788         | 1.13 (1.11 - 1.16)                            | 88,738 (72,402 - 105,075)   | 41.63                                     | 97,532              | 45.76                                       | 874.28                               |
| Pandemic period (March 2020-February 2022, 24 months) | 770,498 (752,524 - 788,472)       | 919,784         | 1.19 (1.17 - 1.22)                            | 149,286 (131,312 - 167,260) | 61.40                                     | 147,882             | 60.82                                       | 1473.64                              |
| <b>South</b>                                          |                                   |                 |                                               |                             |                                           |                     |                                             |                                      |
| Wave 1 (March-May 2020, 3 months)                     | 211,671 (198,726 - 224,616)       | 227,967         | 1.08 (1.01 - 1.15)                            | 16,296 (3,351 - 29,241)     | 25.76                                     | 15,625              | 24.70                                       | 77.27                                |
| Wave 2 (June 2020-September 2020, 4 months)           | 261,422 (246,212 - 276,632)       | 319,515         | 1.22 (1.16 - 1.30)                            | 58,093 (42,883 - 73,303)    | 68.33                                     | 42,427              | 49.91                                       | 273.34                               |
| Wave 3 (October 2020-February 2021, 5 months)         | 355,726 (338,452 - 372,999)       | 465,929         | 1.31 (1.25 - 1.38)                            | 110,203 (92,930 - 127,477)  | 102.85                                    | 100,392             | 93.70                                       | 514.27                               |
| Spring 2021 (March 2021-June 2021, 4 months)          | 278,841 (263,430 - 294,251)       | 291,264         | 1.04 (0.99 - 1.11)                            | 12,423 (-2,987 - 27,834)    | 14.38                                     | 17,694              | 20.48                                       | 57.50                                |
| Delta (July 2021-December 2021, 6 months)             | 415,947 (396,520 - 435,374)       | 505,628         | 1.22 (1.16 - 1.28)                            | 89,681 (70,254 - 109,108)   | 68.45                                     | 67,122              | 51.23                                       | 410.69                               |
| Omicron (January 2022-February 2022, 2 months)        | 144,152 (134,074 - 154,231)       | 191,118         | 1.33 (1.24 - 1.43)                            | 46,966 (36,887 - 57,044)    | 106.72                                    | 40,167              | 91.28                                       | 213.45                               |
| 2020 (March 2020-December 2020, 10 months)            | 686,723 (661,712 - 711,735)       | 815,861         | 1.19 (1.15 - 1.23)                            | 129,138 (104,126 - 154,149) | 60.78                                     | 107,663             | 50.67                                       | 607.78                               |
| 2021 (January 2021-December 2021, 12 months)          | 836,883 (809,134 - 864,633)       | 994,442         | 1.19 (1.15 - 1.23)                            | 157,559 (129,809 - 185,308) | 60.51                                     | 135,597             | 52.07                                       | 726.10                               |
| 2022 (January 2022-February 2022, 2 months)           | 144,152 (134,091 - 154,214)       | 191,118         | 1.33 (1.24 - 1.43)                            | 46,966 (36,904 - 57,027)    | 106.72                                    | 40,167              | 91.28                                       | 213.45                               |
| Post Wave 1 (June 2020-February 2022, 21 months)      | 1,456,088 (1,400,189 - 1,511,987) | 1,773,454       | 1.22 (1.17 - 1.27)                            | 317,366 (261,467 - 373,265) | 69.97                                     | 267,802             | 59.04                                       | 1469.28                              |
| Pandemic period (March 2020-February 2022, 24 months) | 1,667,759 (1,604,657 - 1,730,860) | 2,001,421       | 1.20 (1.16 - 1.25)                            | 333,662 (270,561 - 396,764) | 64.55                                     | 283,427             | 54.84                                       | 1549.30                              |
| <b>West</b>                                           |                                   |                 |                                               |                             |                                           |                     |                                             |                                      |
| Wave 1 (March-May 2020, 3 months)                     | 113,694 (109,317 - 118,070)       | 118,762         | 1.04 (1.01 - 1.09)                            | 5,068 (692 - 9,445)         | 13.54                                     | 7,414               | 19.80                                       | 40.61                                |
| Wave 2 (June 2020-September 2020, 4 months)           | 135,411 (130,425 - 140,396)       | 157,200         | 1.16 (1.12 - 1.21)                            | 21,789 (16,804 - 26,775)    | 43.27                                     | 14,936              | 29.66                                       | 173.09                               |
| Wave 3 (October 2020-February 2021, 5 months)         | 186,592 (180,963 - 192,221)       | 248,679         | 1.33 (1.29 - 1.37)                            | 62,087 (56,458 - 67,716)    | 97.67                                     | 57,297              | 90.14                                       | 488.37                               |
| Spring 2021 (March 2021-June 2021, 4 months)          | 148,989 (143,900 - 154,078)       | 150,037         | 1.01 (0.97 - 1.04)                            | 1,048 (-4,041 - 6,137)      | 2.04                                      | 6,596               | 12.85                                       | 8.17                                 |
| Delta (July 2021-December 2021, 6 months)             | 215,754 (209,482 - 222,025)       | 256,936         | 1.19 (1.16 - 1.23)                            | 41,182 (34,911 - 47,454)    | 52.84                                     | 28,562              | 36.65                                       | 317.03                               |
| Omicron (January 2022-February 2022, 2 months)        | 76,831 (73,264 - 80,397)          | 97,719          | 1.30 (1.24 - 1.36)                            | 22,888 (19,322 - 26,455)    | 87.37                                     | 18,156              | 69.30                                       | 174.74                               |
| 2020 (March 2020-December 2020, 10 months)            | 359,995 (352,094 - 367,896)       | 418,814         | 1.16 (1.14 - 1.19)                            | 58,819 (50,918 - 66,720)    | 46.73                                     | 49,598              | 39.40                                       | 467.27                               |
| 2021 (January 2021-December 2021, 12 months)          | 440,445 (431,679 - 449,211)       | 512,800         | 1.16 (1.14 - 1.19)                            | 72,355 (63,589 - 81,121)    | 46.76                                     | 65,207              | 42.14                                       | 561.09                               |
| 2022 (January 2022-February 2022, 2 months)           | 76,831 (73,237 - 80,424)          | 97,719          | 1.30 (1.24 - 1.36)                            | 22,888 (19,295 - 26,482)    | 87.37                                     | 18,156              | 69.30                                       | 174.74                               |
| Post Wave 1 (June 2020-February 2022, 21 months)      | 763,576 (749,787 - 777,365)       | 912,571         | 1.20 (1.17 - 1.22)                            | 148,995 (135,206 - 162,784) | 55.31                                     | 125,547             | 46.61                                       | 1161.53                              |
| Pandemic period (March 2020-February 2022, 24 months) | 877,270 (862,043 - 892,496)       | 1,031,333       | 1.18 (1.16 - 1.20)                            | 154,063 (138,837 - 169,290) | 50.21                                     | 132,961             | 43.34                                       | 1205.11                              |



# Supplemental Figure 2A

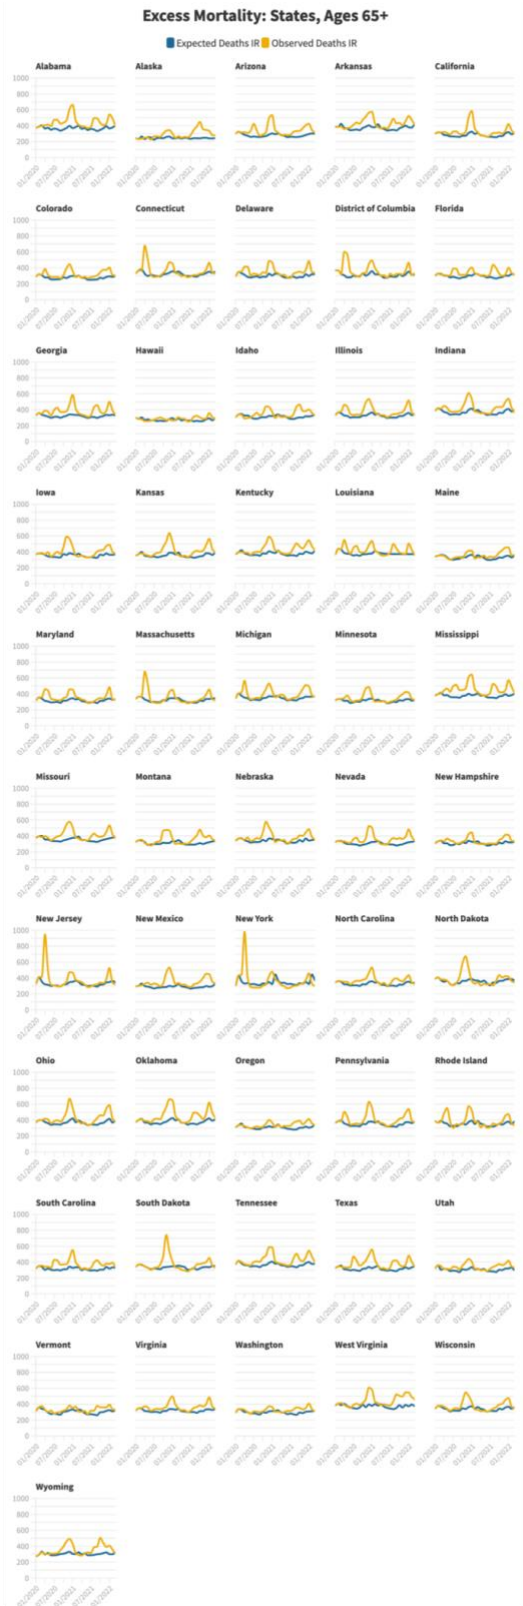

# Supplemental Figure 2A.2

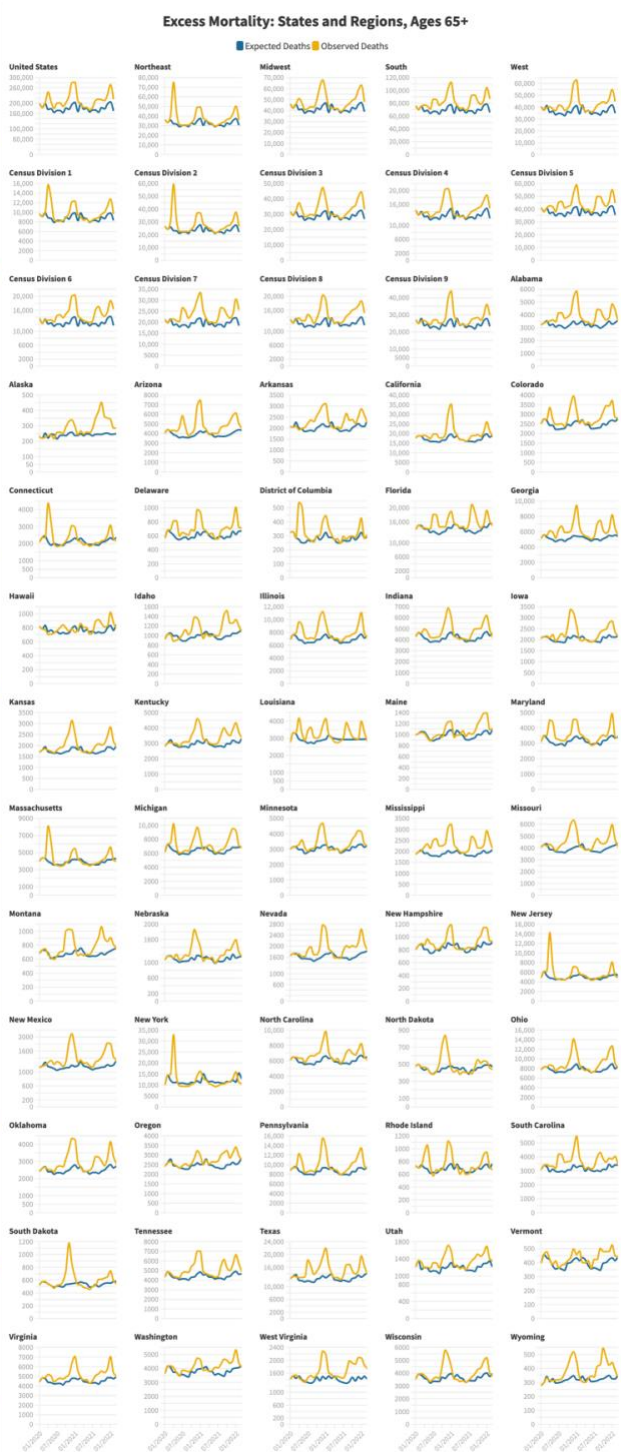

# Supplemental Figure 2B

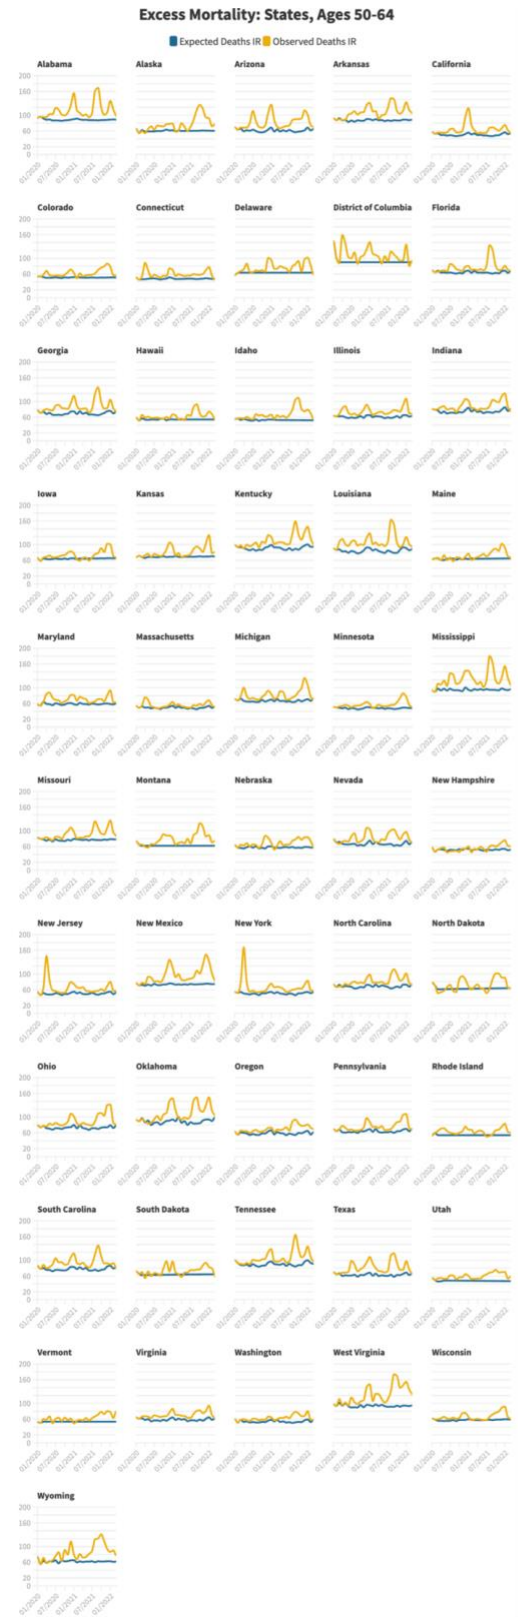

# Supplemental Figure 2B.2

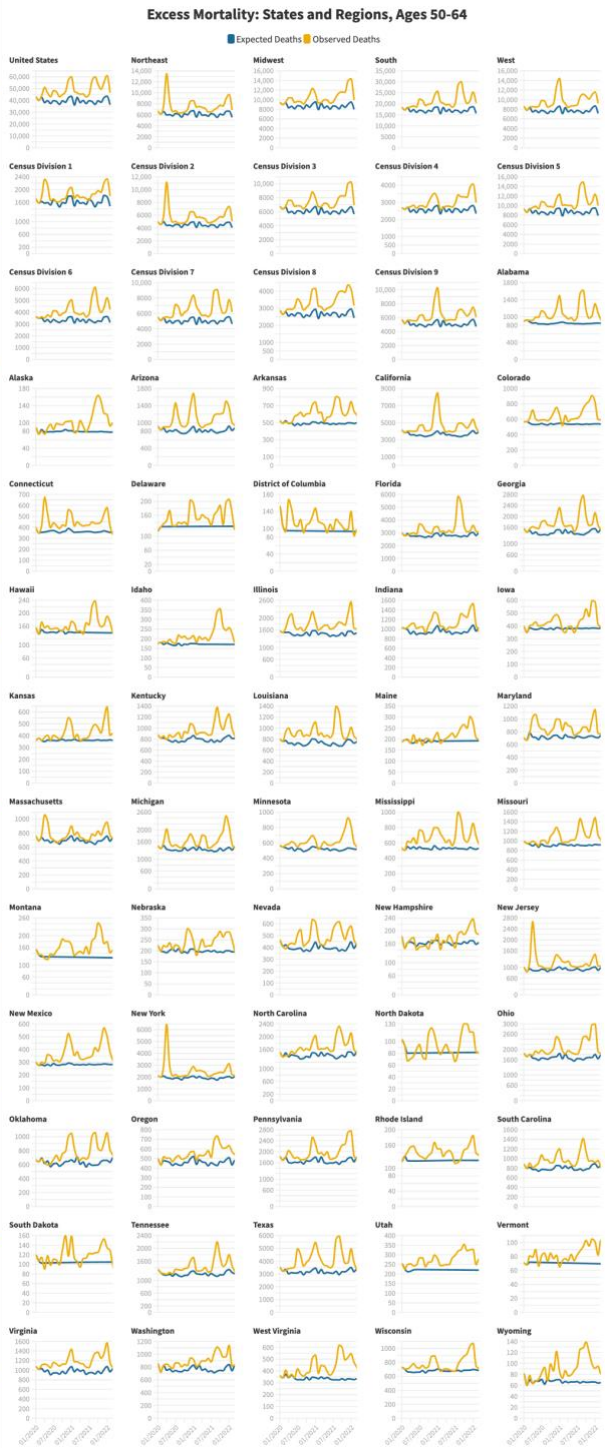



Supplemental Figure 2C

Supplemental Figure 2C.2

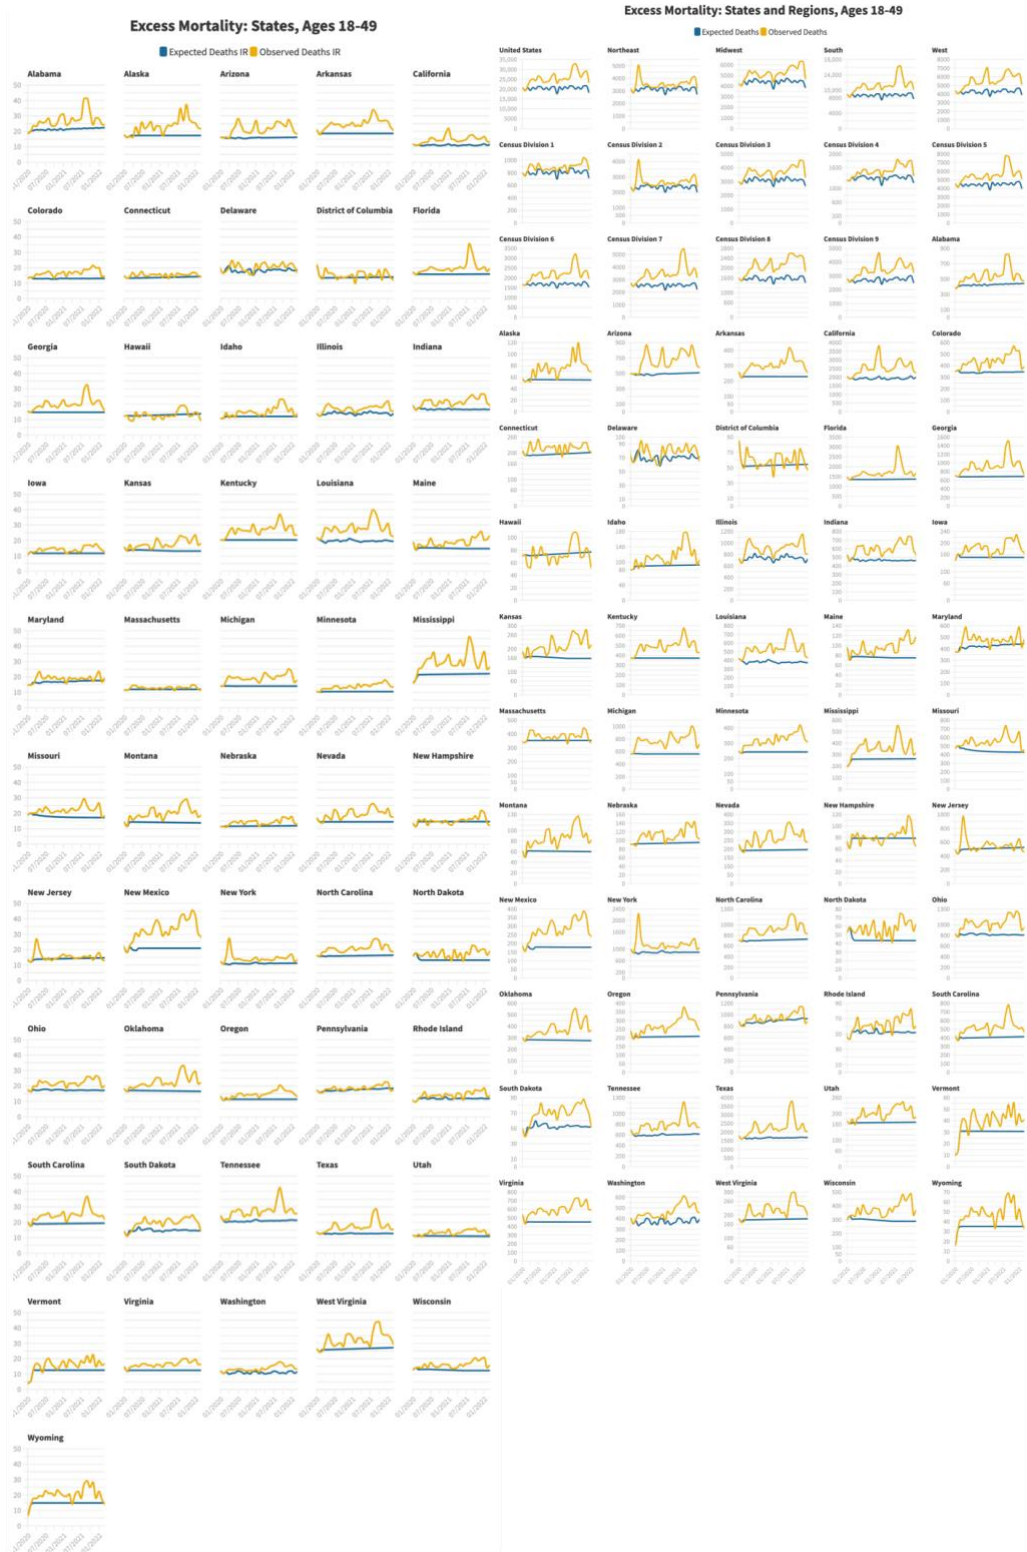

# Supplemental Figure 2D

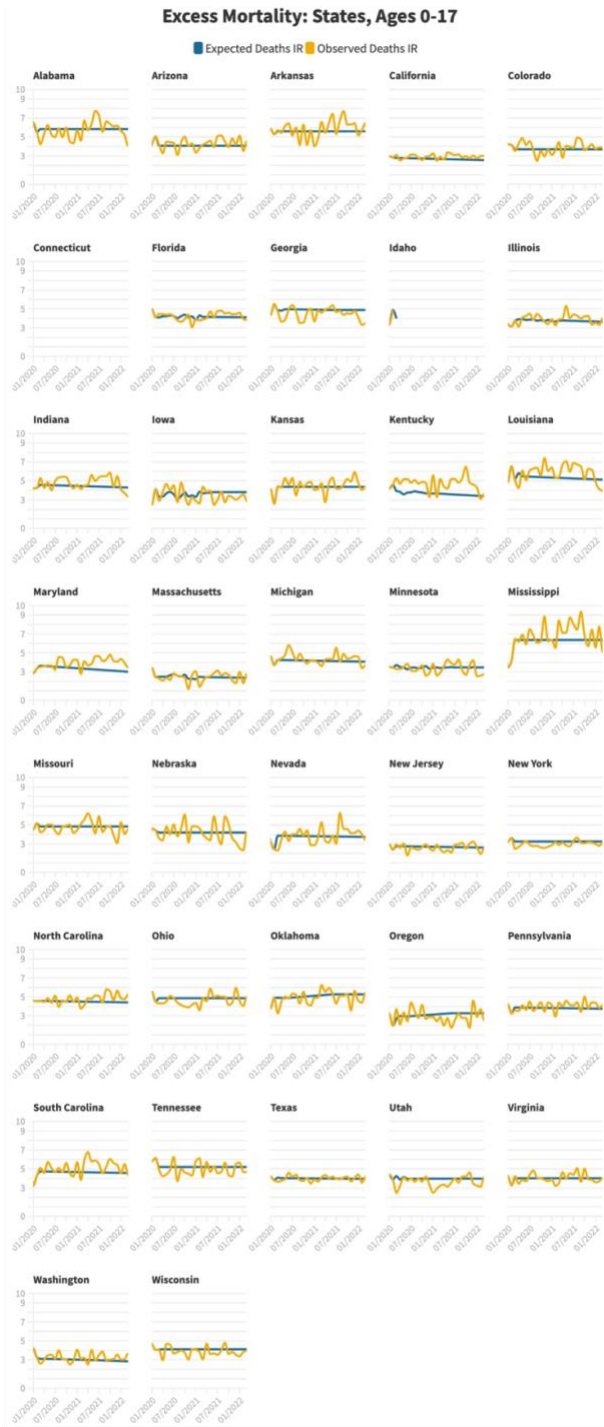

# Supplemental Figure 2D.2

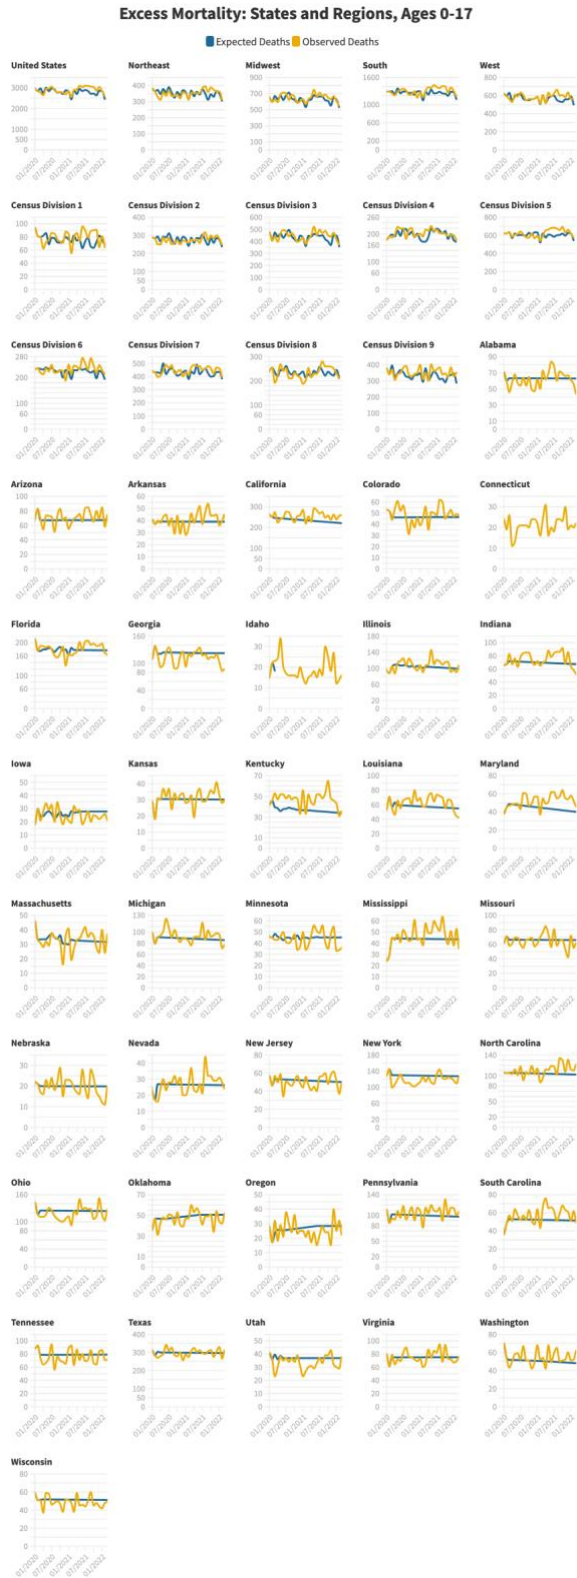

# Supplemental Figure 2E.1

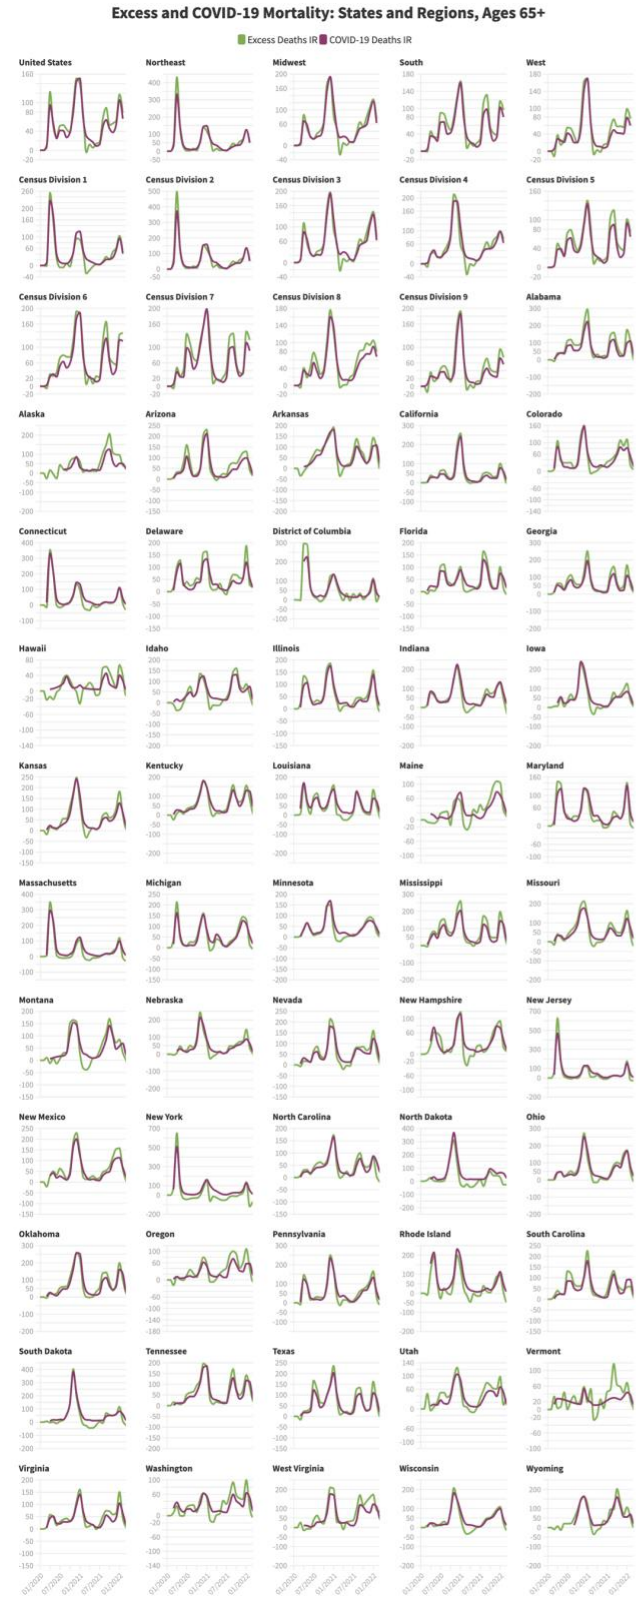

# Supplemental Figure 2E.2

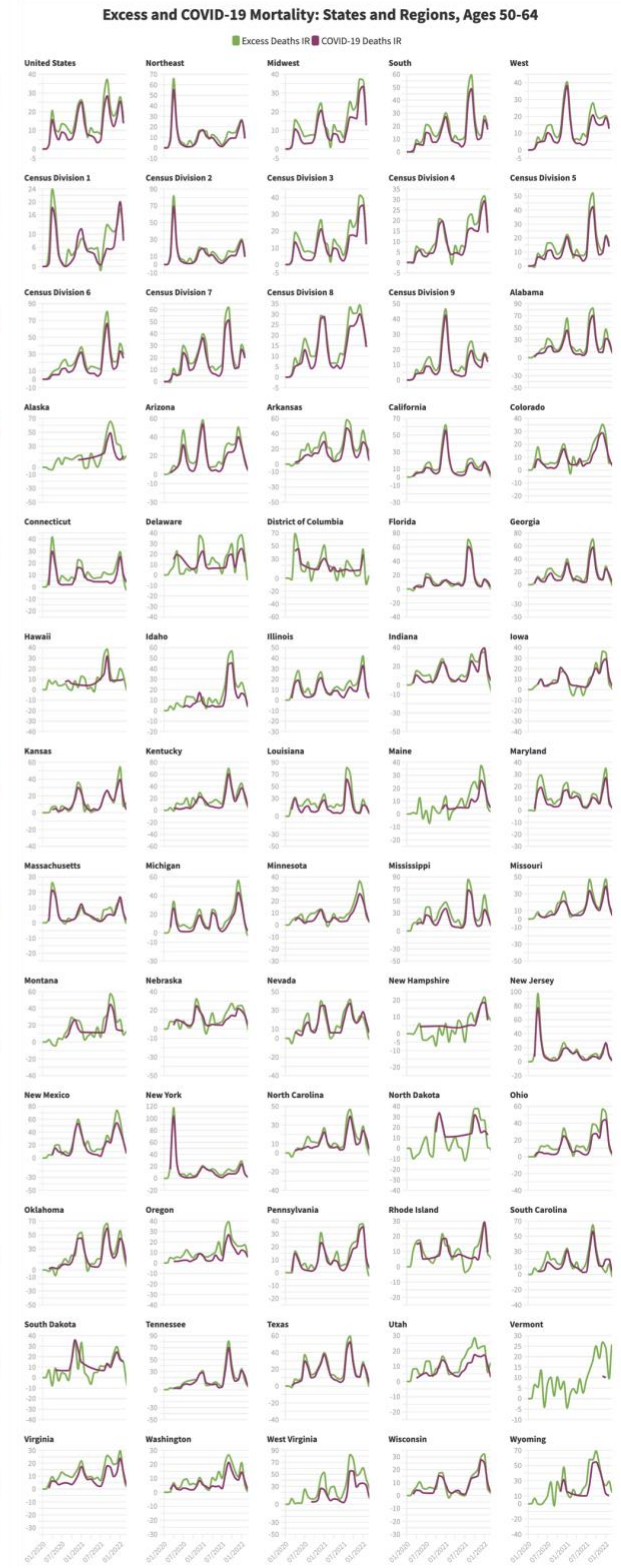



# Supplemental Figure 2E.3

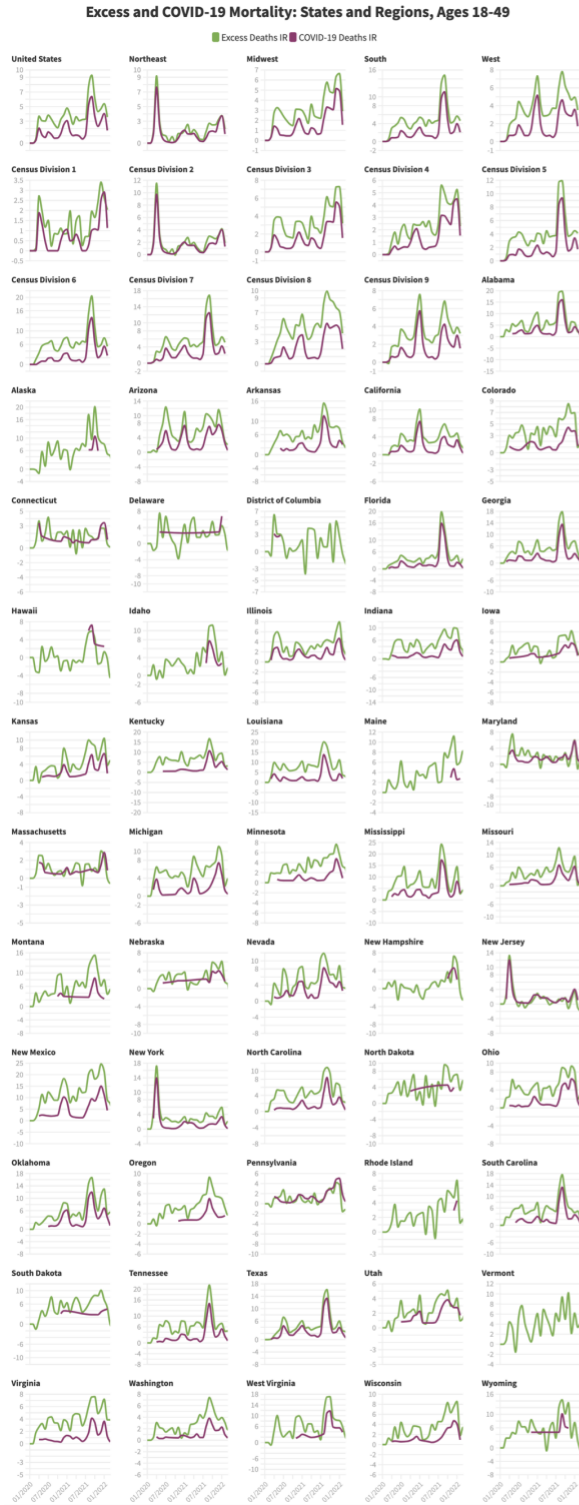

# Supplemental Figure 2E.4

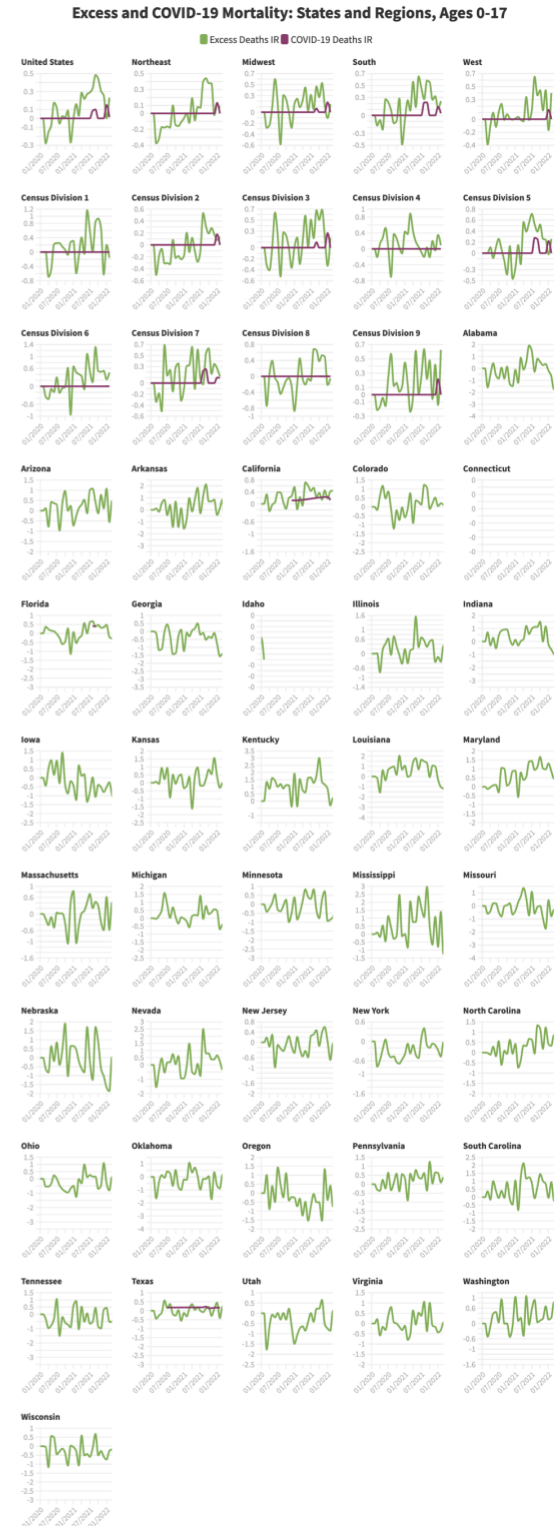

# Supplemental Figure 3A

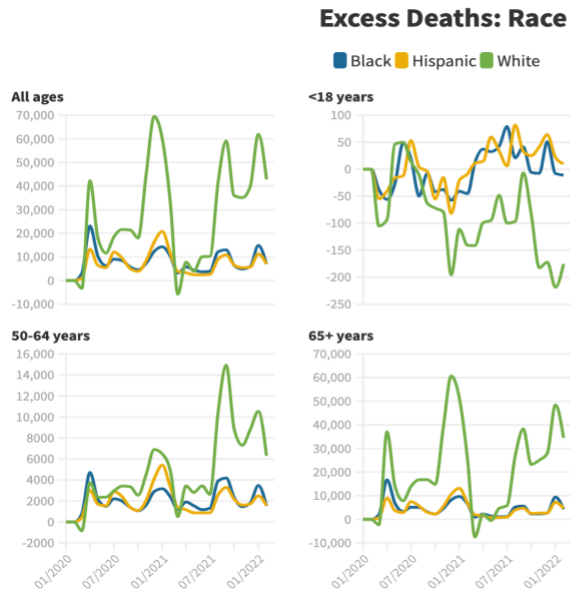

Supplemental Figure 3B

Supplemental Figure 3C

Supplemental Figure 3D

Supplemental Figure 3E

Supplemental Figure 3F

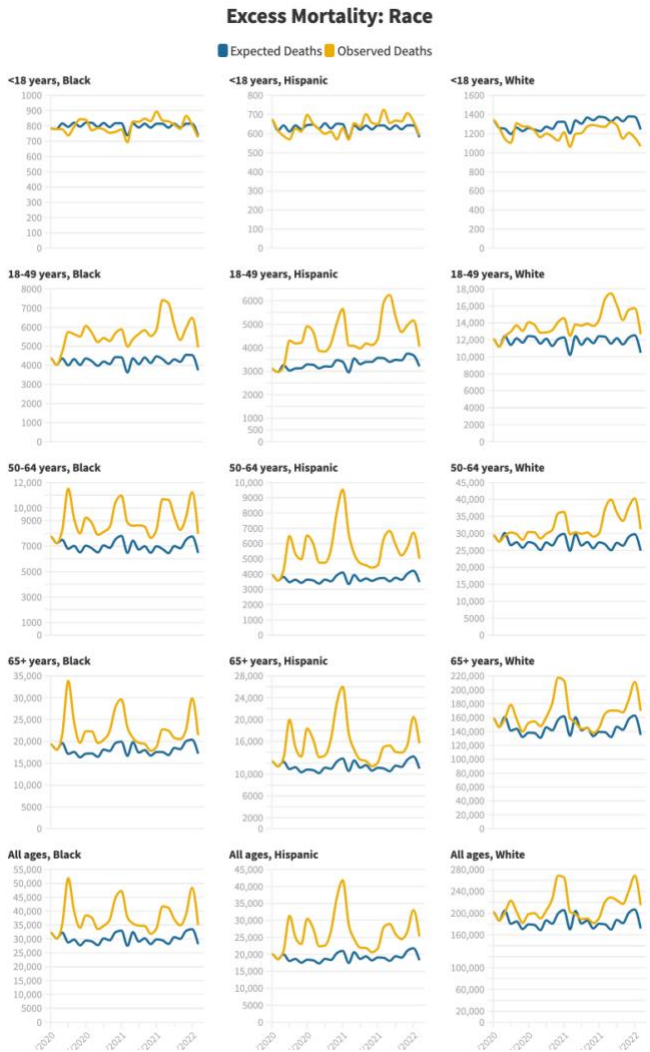

Supplement: Supplementary file [file media-1.pdf]
